# Supplementary material
Source: PubMed Central journal article supplement (PMC2749223)

## **Supplemental Experimental Procedures**

### **Nuclear/cytoplasmic RNA fractionation from hESCs**

H9 or H14 cells were grown in 10 cm dishes plated with Matrigel. After reaching 70% confluence, the clones were individualized with Accutase (Innovative Cell Technologies, Inc., San Diego, CA) for 10 minutes at 37°C. Cells were centrifuged at 1,000 rpm for 5 min and rinsed with ice-cold PBS. Cell pellets were resuspended by gentle pipetting in 200  $\mu$ L lysis buffer A [10 mM Tris (pH8.0), 140 mM NaCl, 1.5 mM MgCl<sub>2</sub>, 0.1% Igepal, 2 mM vanadyl ribonucleoside complex (VRC; Invitrogen)], and incubated on ice for 5 min. 1/5 of the total RNAs were extracted by Trizol reagent (Invitrogen). The rest of the lysate was centrifuged at 1,000 g for 3 min at 4°C to isolate the cytoplasmic fractionation and pellet the nuclei. Cytoplasmic fractions were further centrifuged at maximum speed and nuclear pellets underwent two additional washes with 160  $\mu$ L lysis buffer A before extraction with Trizol. In all analyses, equal amounts of cytoplasmic and RNA samples were used, representing comparable cell-equivalents.

### **Antibodies used in immunofluorescence microscopy and immunoblots**

Antibodies used in immunofluorescence microscopy were Mouse anti-SSEA4 (1:50, Developmental Studies Hybridoma Bank (DSHB), Rat anti-SSEA3 (1:50, Santa Cruz Biotechnology), mouse anti-Troma-1 (1:50, DSHB), mouse anti-p54<sup>nrb</sup> (1:150, BD Transduction Laboratories, Palo Alto, CA), mouse anti-PSF (1:150, Sigma, St. Louis, MO), Rabbit anti-PSP1 $\alpha$  (1:100, Dundee Cell Products, UK), mouse anti-SC35 (1:200, Sigma) and mouse anti-dsRNA, J2 antibody (1:200, English & Scientific Consulting, Hungary) were used as the primary antibodies. TRITC-labeled anti-mouse IgG (1:500, Molecular Probes), Alexa Fluor 488-labeled anti-rabbit

IgG (1:500, Molecular Probes) and Alexa Fluor 488-labeled anti-rat IgG (1:500, Invitrogen) were used to detect each specific primary antibody in cells. The nuclei were counterstained with DAPI.

Antibodies used in immunoblots were mouse anti-PSF (1:1,000), mouse anti-p54<sup>nrb</sup> (1:2000), Rabbit anti-PSP1 $\alpha$  (1:1,000), rabbit anti-Sox2 (1:1000, Millipore, Billerica, MA), goat anti-ADAR1 (C-16) (1:250, Santa Cruz Biotechnology).

### **Primers**

Primers used for hNEAT1:

*NEAT1*-middle-S: GGGGAGAGGGTTGGTTAGAG;

*NEAT1*-middle-AS: GGTTCTCGGAAAACCTGGTGA;

*NEAT1*-3'end-S: TTGGTTCTGAGCTGCGTCTA;

*NEAT1*-3'end-AS: TGTGCTGTAAAGGGGAAGAAA

Primers used to test hESCs' pluripotency (Takahashi et al., 2007):

*Oct3/4*-S: GACAGGGGGAGGGGAGGAGCTAGG;

*Oct3/4*-AS: CTTCCCTCCAACCAGTTGCCCAAAC;

*Sox2*-S: GGGAAATGGGAGGGGTGCAAAA GAGG;

*Sox2*-AS: TTGCGTGAGTGTGGATGGGATTGGTG

Primers used for northern blotting analysis:

*Lin28*-upstream-S: GGGGAATCACCTACAACCT;

*Lin28*-upstream-AS: CTTGGCTCCATGAATCTGGT;

*Paics*-upsteam-S: TGGCTGTTCAACCGTACTTTC;

*Paics*-upsteam-AS:CTTGCTTGATTTTC CTTCAGC

Primers used for editing analysis of the *AluSc* in *Lin28* mRNA:

*Lin28-AluSc-S*: TGATAACTTGGTGTATTCATGCCAAAC;

*Lin28-AluSc-AS*: TAAGGAGGTTTGATCCATCC

Primers used for mRNA nuclear and cytoplasmic distribution analysis:

*actin-S*: GCTCGTCGTCGACAACGGCTC;

*actin-AS*: CAAACATGATCTGGGTCATCTTCTC;

*Flnb-S*: CAGCAGACAGACCAGGAACA;

*Flnb-AS*: GATGAGGAGCGGTAAAGCAG;

*Hyou1-S*: GAATCCTTTGCCTGTGGGTA;

*Hyou1-AS*: CCTGGTAACTGAGGCTCTGC;

*Lin28-upstream-S*: GGGGAATCACCCCTACAACCT;

*Lin28-upstream-AS*: CTTGGCTCCATGAATCTGGT;

*Lin28-downstream-S*: GGAGGCCAAGAAAGGGAATA;

*Lin28-downstream-AS*: CCGCCCCATAAATTCAAGAT;

*Nup43-upstream-S*: CACCAAGGAGGAAGAAGCAG;

*Nup43-upstream-AS*: TCGGTTCCACAAACAAGACA;

*Nup43-downstream-S*: TGTGTGAGTGGGATCCAAAA;

*Nup43-downstream-AS*: CTGGTGATTGGCTCATCTCA;

*Paics-upsteam-S*: TGGCTGTTCAACCGTACTTTC;

*Paics-upsteam-AS*:CTTGCTTGATTTTC CTTCAGC;

*Paics-downstream-S*: CGTAATTTTGGACTGCCACA;

*Paics-downstream-AS*: GCTAAGCATAGCACATCAGAGC;

*Pccb-upstream-S*: GAGTCTTTGGCTGGCTATGC;

*Pccb-upstream-AS*: CCTCCTGGGTAACATCCTCA;

*Pccb*-downstream-S: CGGTGTACAGCATCTGTTGG;

*Pccb*-downstream-AS: CATCTCTGCCAAAAACCACA;

*Smc1a*-S: CATGAAGGCAAGAAACAGCA;

*Smc1a*-AS: TGCCGTACCTGTTTGTGGTA;

*Son*-S: GGAGCTGCCTAAGACCACAG;

*Son*-AS: CTCAGGCACTGGGGTAGAAA

## Supplemental Figures and legends

**Supplemental Figure 1.** **A.** H9 cells express ADAR1 under different culture conditions. Western blot analysis of ADAR1 in HEK293 cells, irradiated (Irr) mouse embryo fibroblasts (MEFs), H9 cells cultured on Irr-MEFs, and H9 cells cultured with Irr-MEFs conditioned medium. **B.** ADAR1 and paraspeckle-related proteins are expressed in H1 cells. Western blotting was used to monitor protein expression in HEK293 cells, HeLa cells and H1 cells.

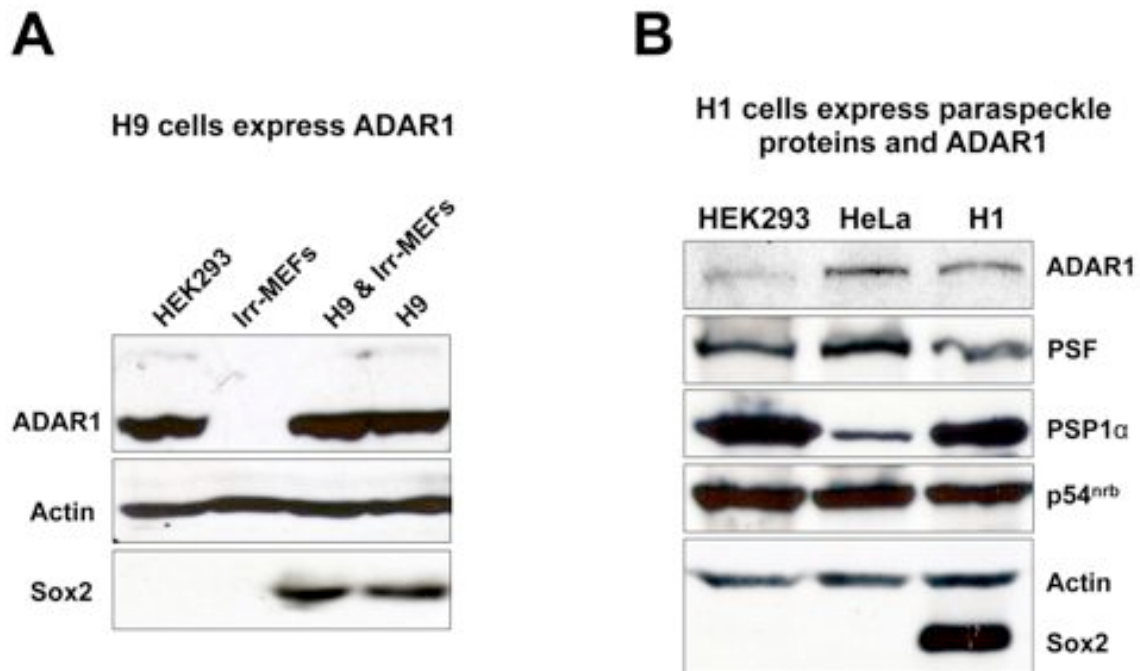

**Supplemental Figure 2.** Editing analysis of IR*Alu*-RNA in hESCs. Total RNA from H9 cells was isolated and the indicated primers (red arrows) were used for RT-PCR, followed by TOPO cloning. 10 out of 20 clones showed evidence of editing (A residues converted to G residues in the clones). This figure shows the percentage of A-to-G changes at each A site within the *AluSc* element. The overall pattern of editing closely resembles the pattern seen in differentiated cells.

### Efficiency of editing of Lin28 mRNA in hESCs

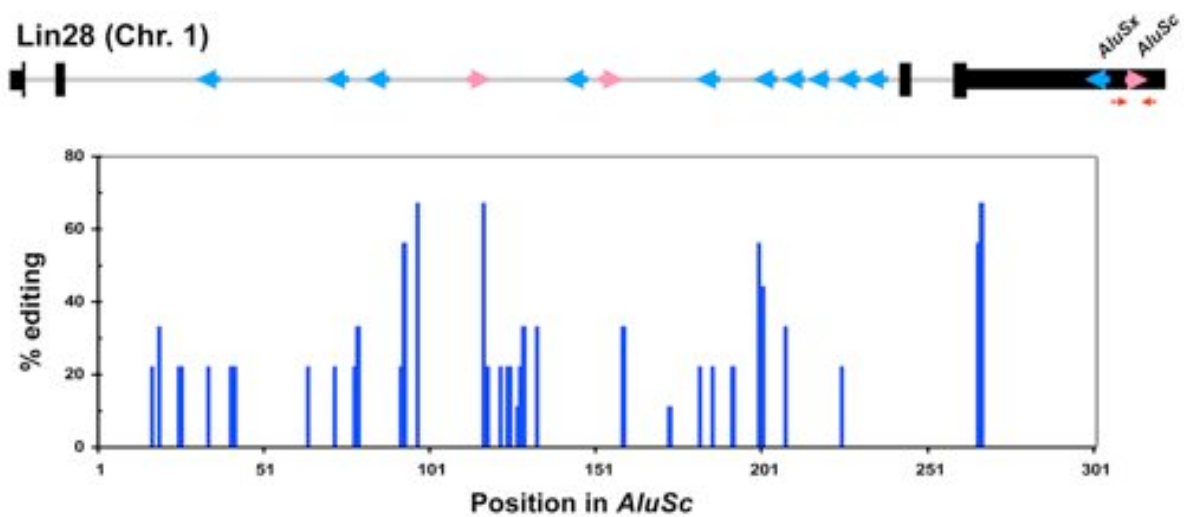

**Supplemental Figure 3.** Organization of several *IRAlus* containing RNAs used in this study.

The genomic sequence of *Paics* and the mature mRNAs of *Pccb* and *Nup43* are drawn roughly to scale. Exons and UTRs are shown as black bars, with coding regions being thicker. The *Alu* elements present in the gene are pink and blue arrows with the indicated orientations. There is a single pair of *IRAlus* in the 3'-UTR in each gene. Evidence of editing in each 3'-UTR *IRAlus* pair can be found in the available sequences in the UCSC genome browser. Blue bars indicate primers used to detect the full-length *IRAlus* containing RNAs in the nuclear retention analysis of Fig. 5. Note that these primers allowed us to discriminate the *IRAlus*-containing RNAs from their shorter isoforms which lack *IRAlus* in their 3'-UTRs. Red bars indicate primers used to detect all transcripts.

**PAICS (phosphoribosylaminoimidazole carboxylase) pre-mRNA**

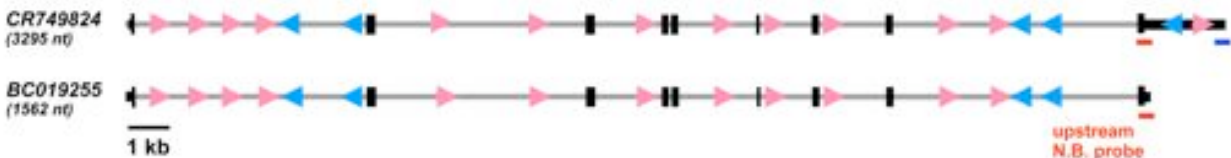

**PCCB (propionyl Coenzyme A carboxylase, beta) mRNAs**

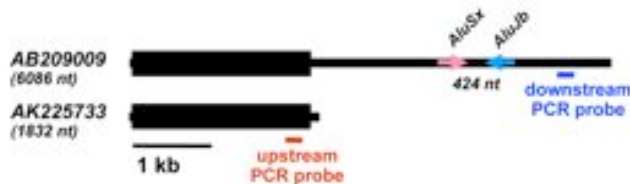

**Nup43 (Nucleoporin 43 kDa) mRNAs**

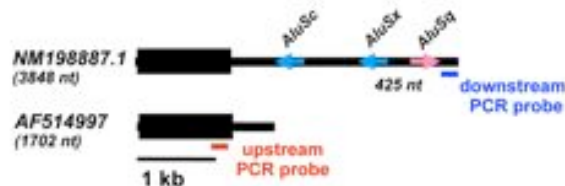

**Supplemental Figure 4.** *IRAlus* containing mRNAs escape nuclear retention in H14 cells. Nuclear and cytoplasmic RNAs were isolated from H14 cells and then analyzed by RT-PCR. PCR primers are located in the downstream of *IRAlus* in the 3'-UTRs to detect the full-length mRNAs (Fig. S3). In H14 cells, the full-length *IRAlus* containing mRNAs *Lin28*, *Paics*, and *Pccb* show very similar nuclear and cytoplasmic distribution to *actin* and *oct3/4*.

## mRNA localization in H14 cells

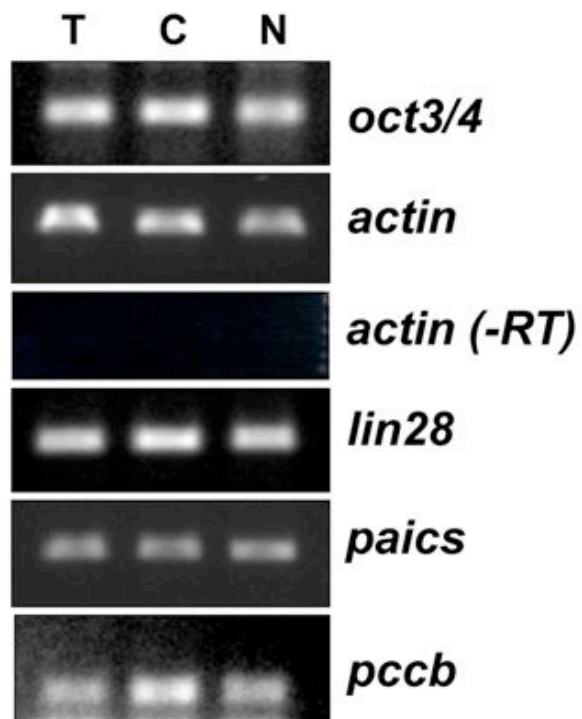



**Supplemental Figure 5.** H14 cells lack paraspeckles. p54<sup>nrb</sup> and PSP1 $\alpha$  colocalize throughout the nucleoplasm in H9 cells, but show no apparent nuclear paraspeckles. p54<sup>nrb</sup> is shown in red, and PSP1 $\alpha$  is shown in green. Representative z-section images (1  $\mu$ M/section from top to bottom of cells) are shown.

### H14 cells lack paraspeckles

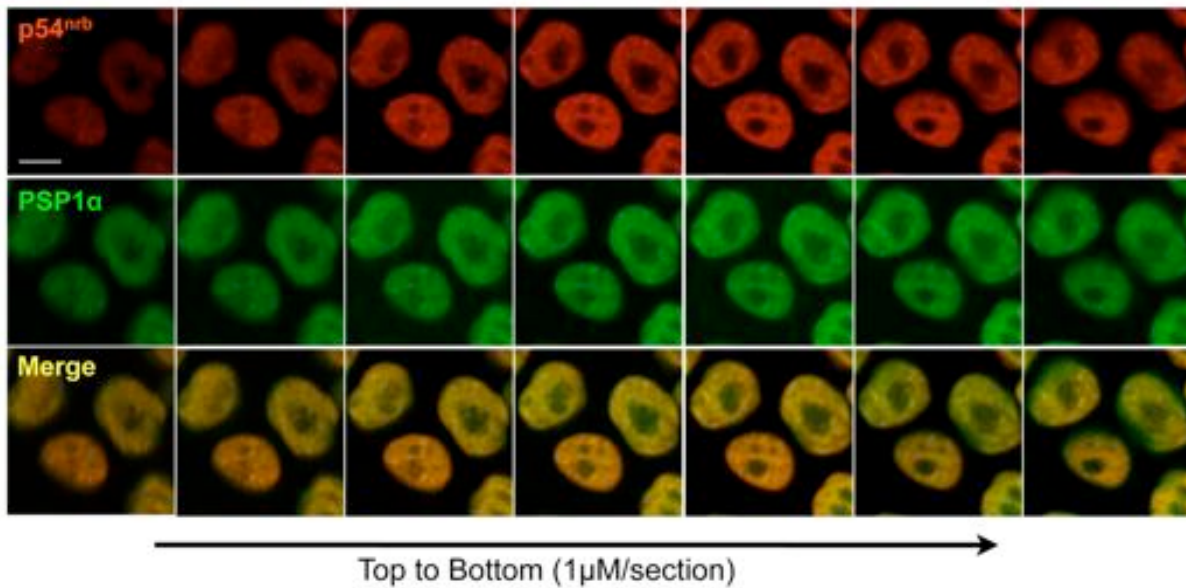

**Supplemental Figure 6.** hNEAT1 RNA colocalizes with p54<sup>nrb</sup>. RNA *in situ* hybridization was performed with green-dUTP-labeled antisense hNEAT1 probe in HeLa cells, and representative z-section images (1  $\mu$ M/section from top to bottom of cells) are shown here. p54<sup>nrb</sup> is shown in red. hNEAT1 exclusively localizes in paraspeckles and forms 5-10 prominent accumulations per nucleus and always colocalizes with accumulations of p54<sup>nrb</sup>.

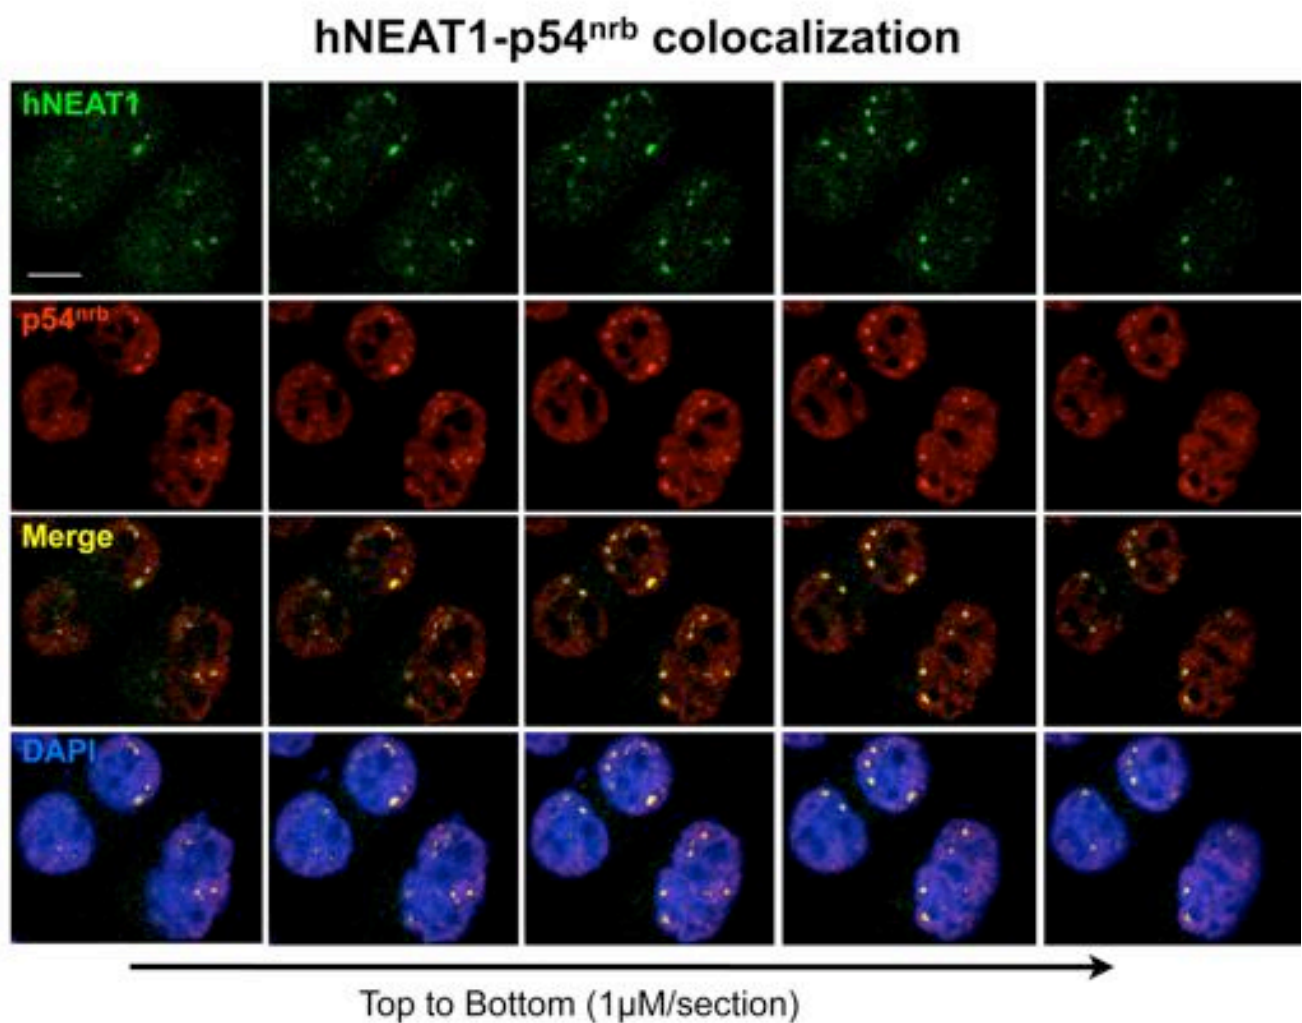

**Supplemental Figure 7.** hNEAT1 RNA colocalizes with PSP1 $\alpha$ . RNA *in situ* hybridization was performed with green-dUTP-labeled antisense hNEAT1 probe in HeLa cells, and representative z-section images (1  $\mu$ M/section from top to bottom of cells) are shown here. PSP1 $\alpha$  is shown in red. hNEAT1 always colocalizes with accumulations of PSP1 $\alpha$ .

### hNEAT1-PSP1 $\alpha$ colocalization

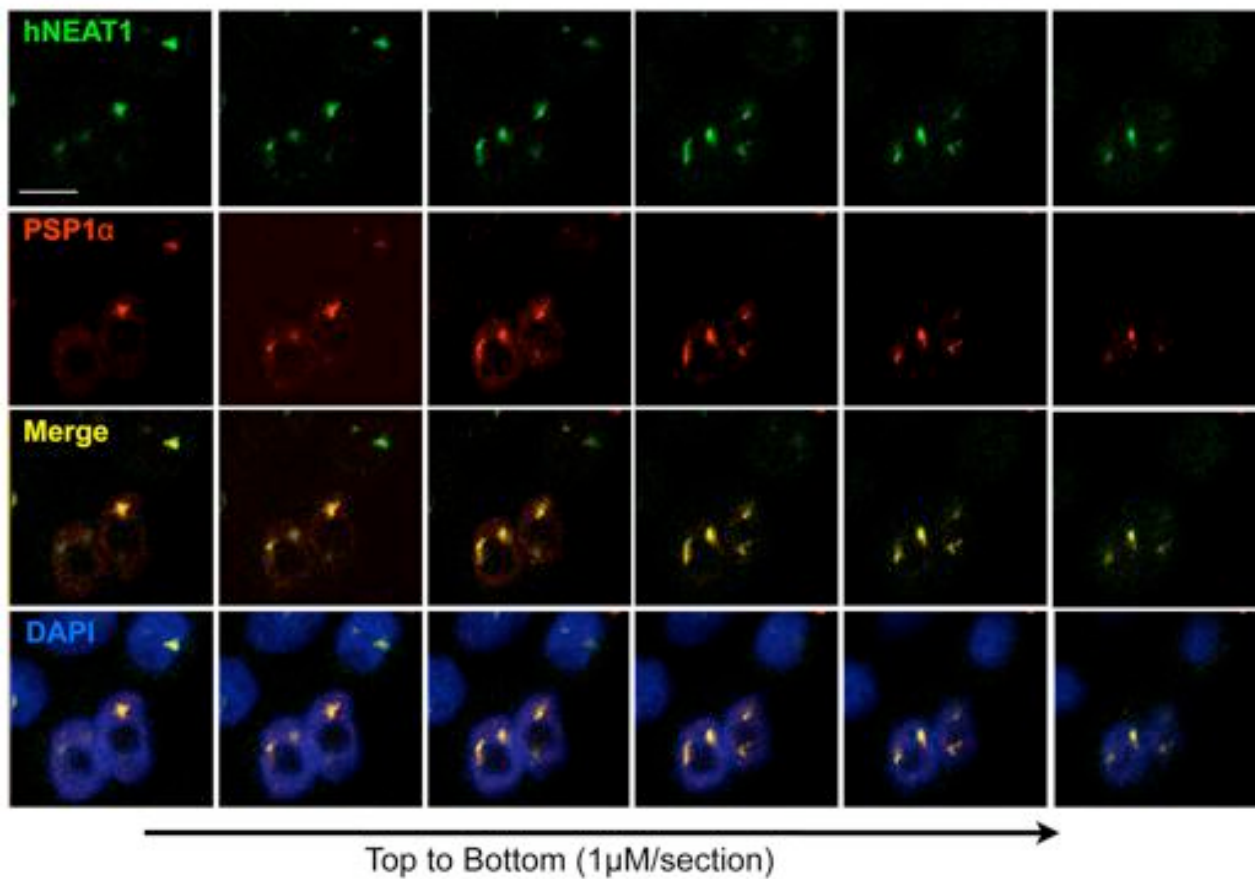

**Supplemental Figure 8.** RT-PCR shows that hNEAT1 is absent from undifferentiated H1 cells.

RT-PCR was carried out with probes for either the middle or the 3'-end of hNEAT1 RNA.

## H1 cells do not express hNEAT1

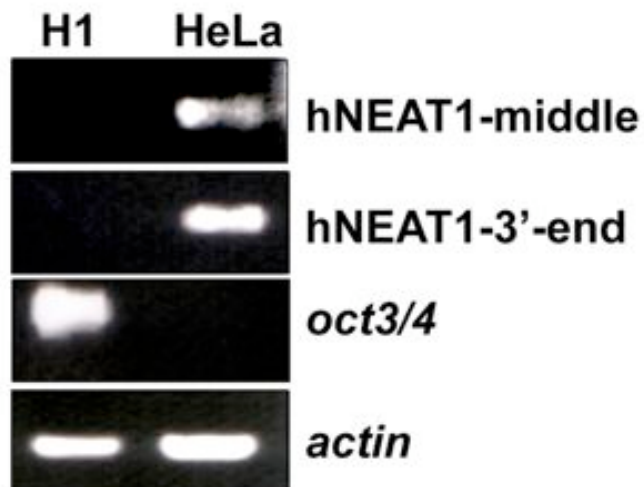

**Supplemental Figure 9.** Day 4 differentiated H14 cells show p54<sup>nrb</sup> and PSP1 $\alpha$  accumulations in the nuclei, indicating paraspeckles. UD, an H14 cell which has not yet differentiated and which shows no apparent nuclear paraspeckles. p54<sup>nrb</sup> is shown in red, and PSP1 $\alpha$  is shown in green. Representative z-section images (1  $\mu$ M/section from top to bottom of cells) are shown.

### Paraspeckles in differentiated H14 cells

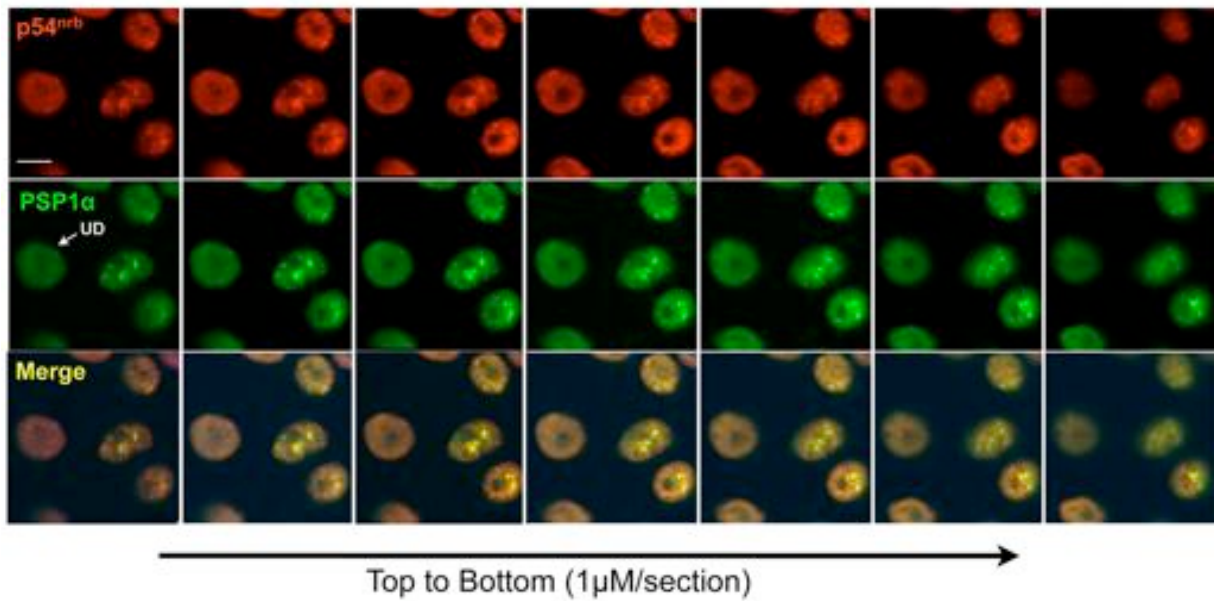

**Supplemental Figure 10.** hNEAT1 knockdown in HeLa cells. hNEAT1 RNA *in situ* hybridization showed significant knockdown of hNEAT1 expression after AS treatment. Left panel, untreated HeLa cells. Right panel, HeLa cells were treated with hNEAT1 AS oligos.

### hNEAT1 knockdown in HeLa cells

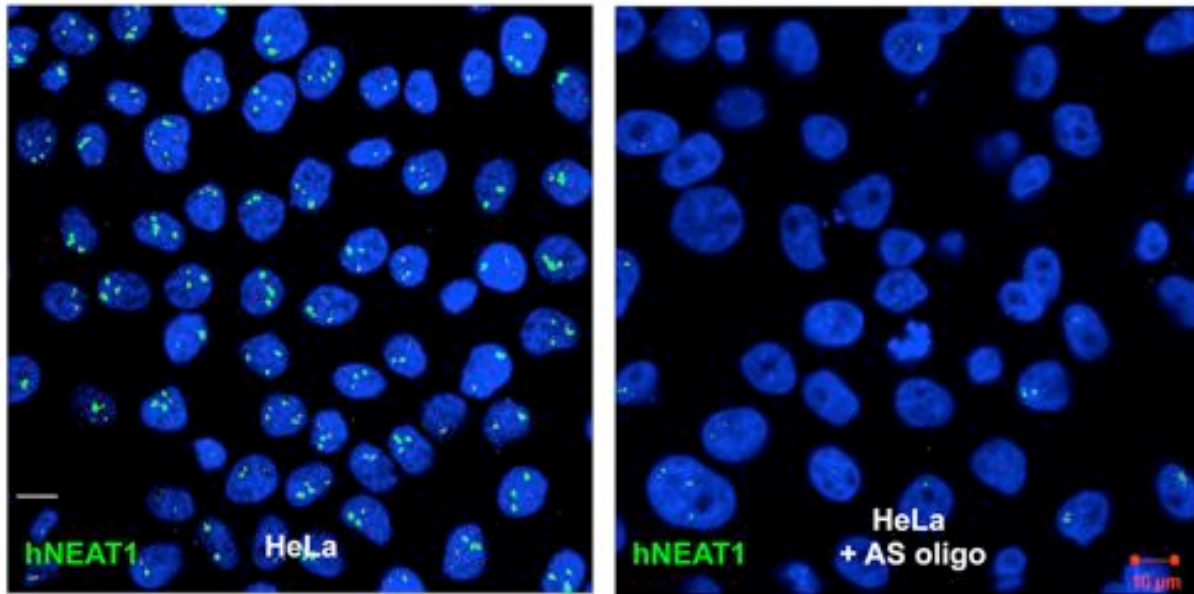

Supplement: NIHMS140395-supplement-01.pdf [file NIHMS140395-supplement-01.pdf]
